# Supplementary material
Source: publisher figshare collection journal article supplement (https://karger.figshare.com/ndownloader/files/36567102)
Supplement: Supplementary file 1 [file 36567102]

| Patient # | #1 | | #2 | | #3 | | #5 | | #6 | | ABL1 | |
| --- | --- | --- | --- | --- | --- | --- | --- | --- | --- | --- | --- | --- |
|  | Ct average | Ct St div | Ct average | Ct St div | Ct average | Ct St div | Ct average | Ct St div | Ct average | Ct St div | Average | St dev |
| slope | -3.493 | 0.086 | -3.587 | 0.054 | -3.420 | 0.0729 | -3.276 | 0.0691 | -3.475 | 0.0522 | -3.359 | 0.033 |
| Y | 38.59 | 1.455 | 34.724 | 0.634 | 36.012 | 1.161 | 44.962 | 1.185 | 32.467 | 0.8647 | 37.697 | 1.277 |
| R2 | 0.998 | 0.008 | 0.999 | 0.00057 | 0.998 | 0.001 | 0.981 | 0.0078 | 0.997 | 0.0016 | 0.998 | 0.0013 |
| Eff | 93.39 | 3.205 | 90.049 | 1.829 | 96.075 | 2.777 | 101.892 | 3.039 | 94.01 | 1.918 | 98.390 | 1.358 |
| CT of wild type  control | 41.5 | 0.75 | 35.64 | 1.28 | 34.593 | 0.809 | 40.13 | 2.779 | 41.56 | 1.5 |  |  |

**Supplementary Table 1: Individual PCR parameters**
